# Supplementary material
Source: publisher site journal article supplement (https://www.spandidos-publications.com/1816/downloadSupplementary)

Figure S1. LD<sub>50</sub> of triclosan in A375 melanoma cells.

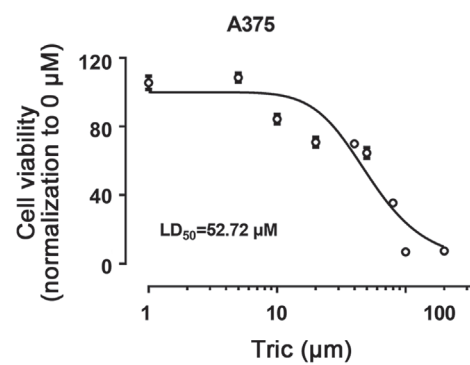

Supplement: Supplementary file 1 [file downloadSupplementary]
